# Supplementary material for: An acoustic-based method for locating maternity colonies of rare woodland bats
Source: PeerJ journal article supplement (doi:10.7717/peerj.15951), 2023-10-03
Supplement: Article_S2.pdf [file Article_S2.pdf]

Weather stations did not record any rainfall during survey periods, or sunset temperatures below 11.6 °C (mean = 16.6 °C). In addition, average ground level wind speeds did not exceed 2.3 m s<sup>-1</sup>, substantially lower than wind speeds (11 m s<sup>-1</sup>) reported by Davidson-Watts (2014, unpublished data), in which radio-tagged barbastelles continued to display the same behaviour as on calmer nights.
